# Supplementary figures and images for: Stability of neocortical synapses across sleep and wake states during the critical period in rats
Source: eLife journal article supplement (doi:10.7554/elife.66304), 2021-06-21

**A**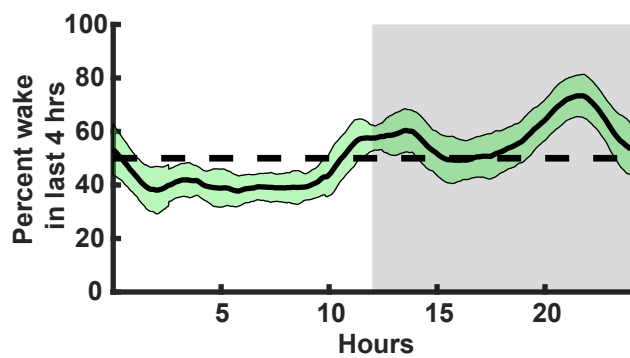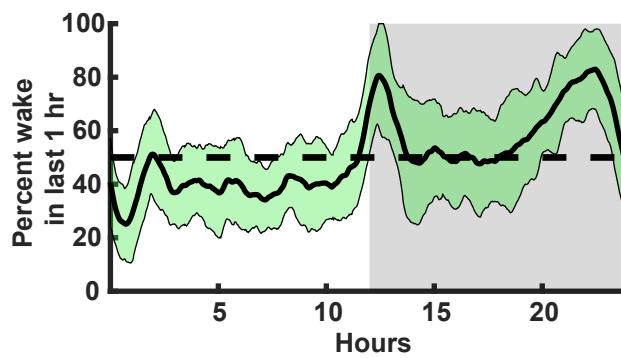**B**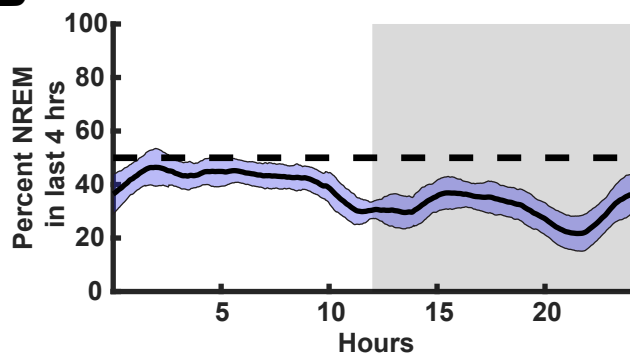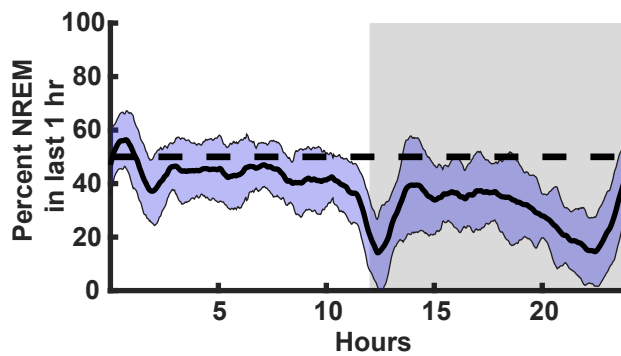**C**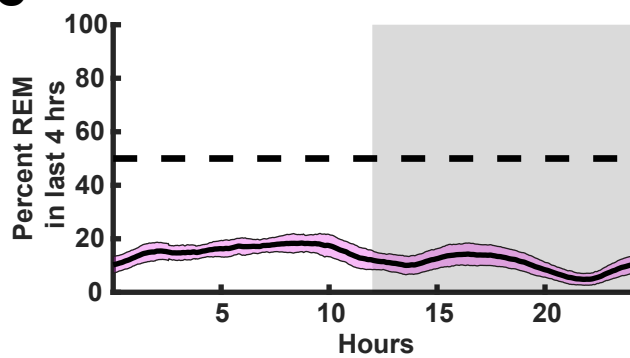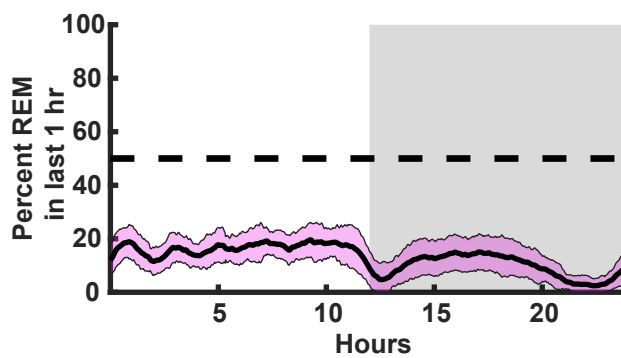

Supplement: supp [file elife_poa_e66304_Figure_1_figure_supplement_1.pdf › elife_poa_e66304_Figure_1_figure_supplement_1.pdf]

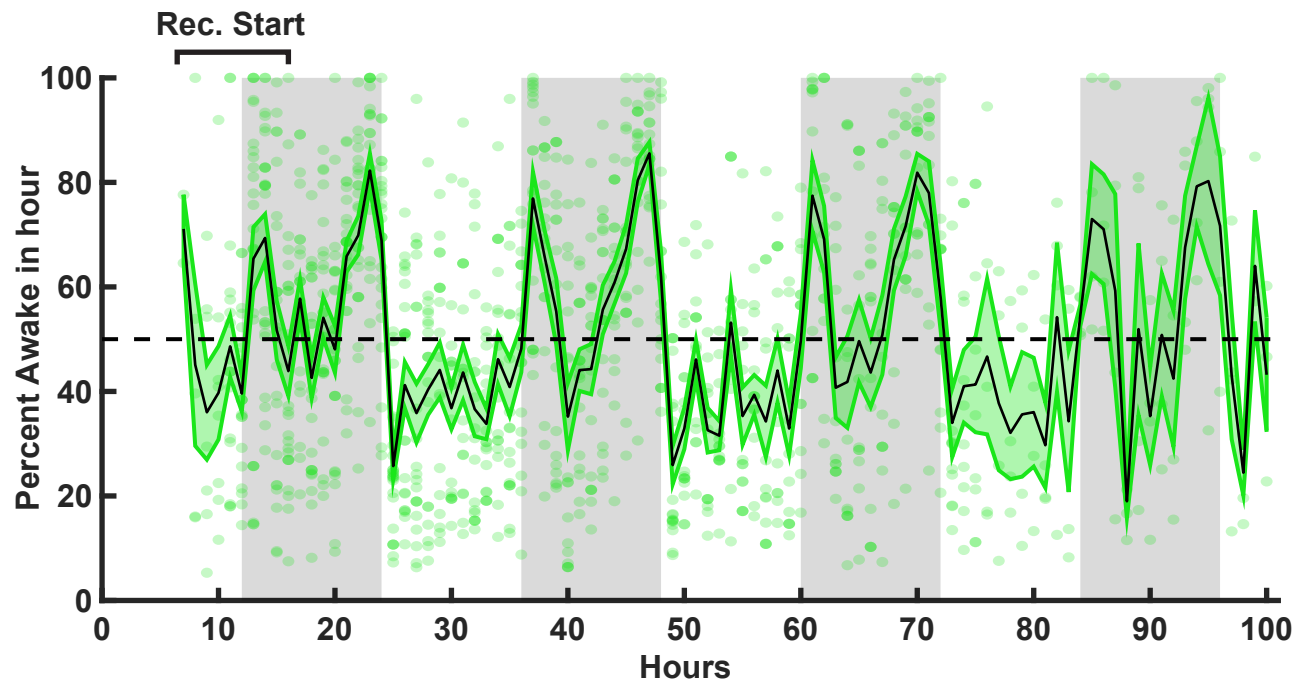

Supplement: supp [file elife_poa_e66304_Figure_1_figure_supplement_2.pdf › elife_poa_e66304_Figure_1_figure_supplement_2.pdf]

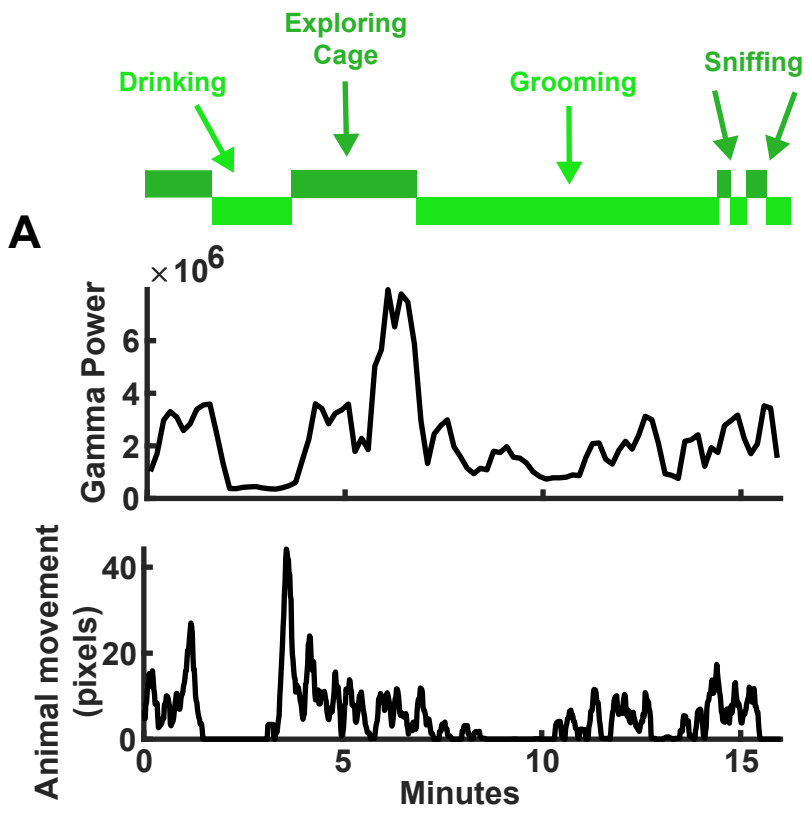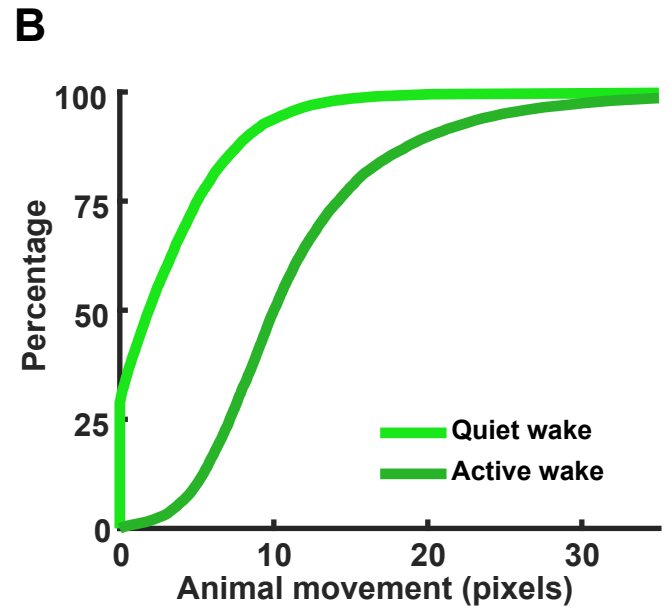

Supplement: supp [file elife_poa_e66304_Figure_2_figure_supplement_1.pdf › elife_poa_e66304_Figure_2_figure_supplement_1.pdf]

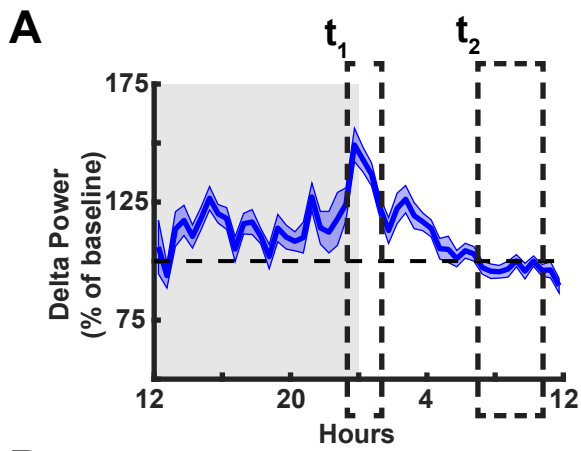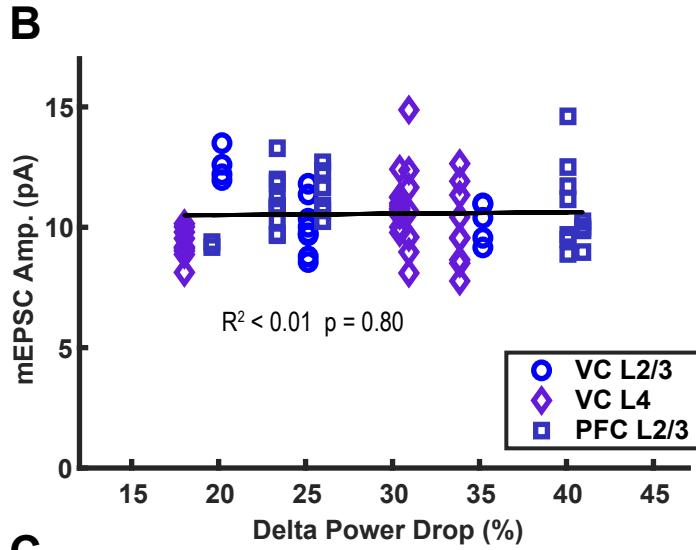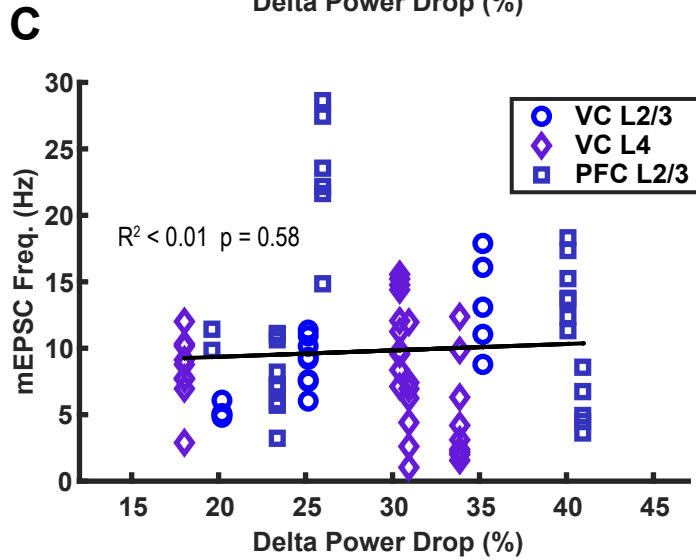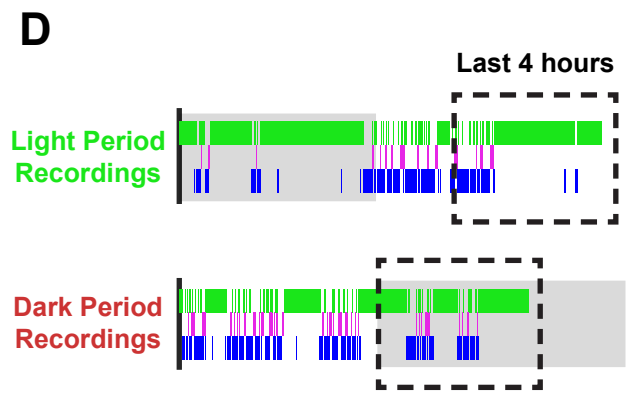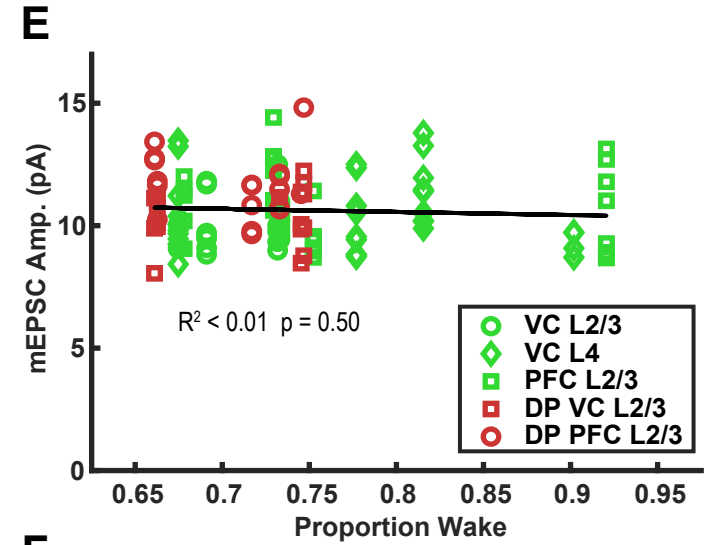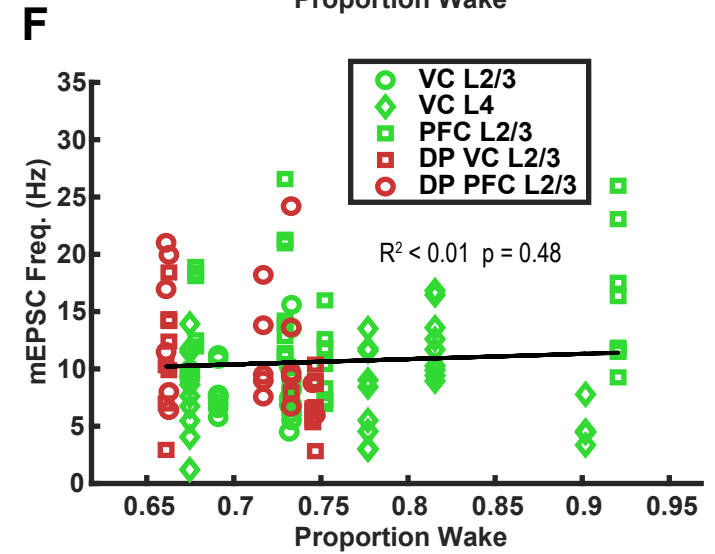

Supplement: supp [file elife_poa_e66304_Figure_3_figure_supplement_1.pdf › elife_poa_e66304_Figure_3_figure_supplement_1.pdf]

# Visual Cortex L4

**A**

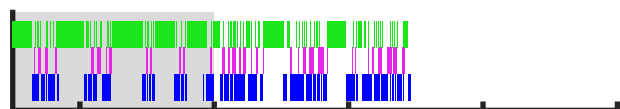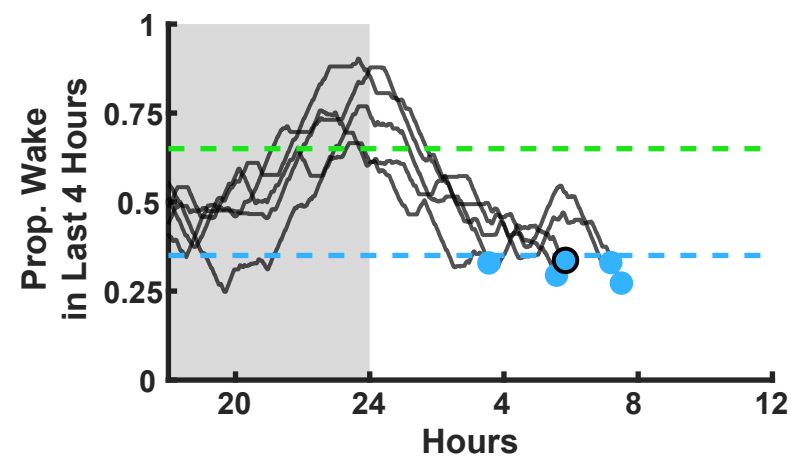

**B**

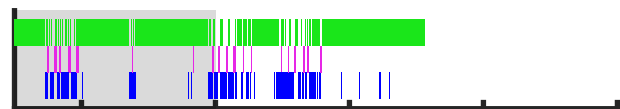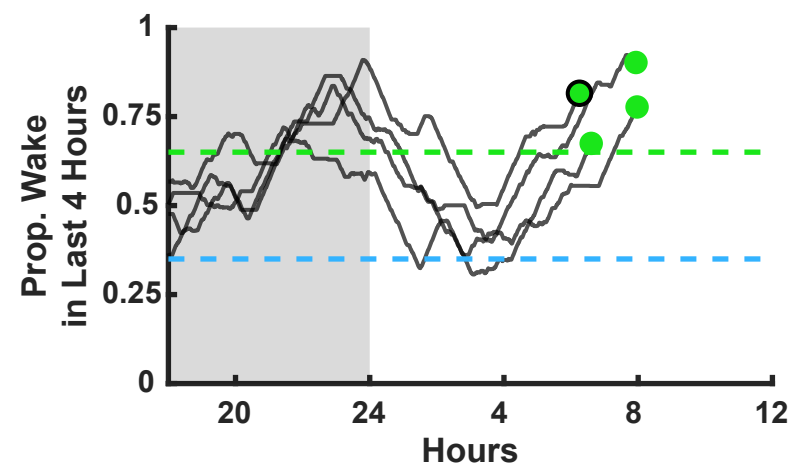

# Prefrontal Cortex L2/3

**C**

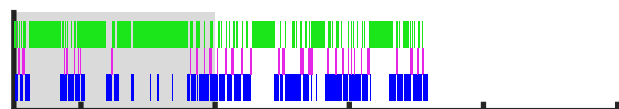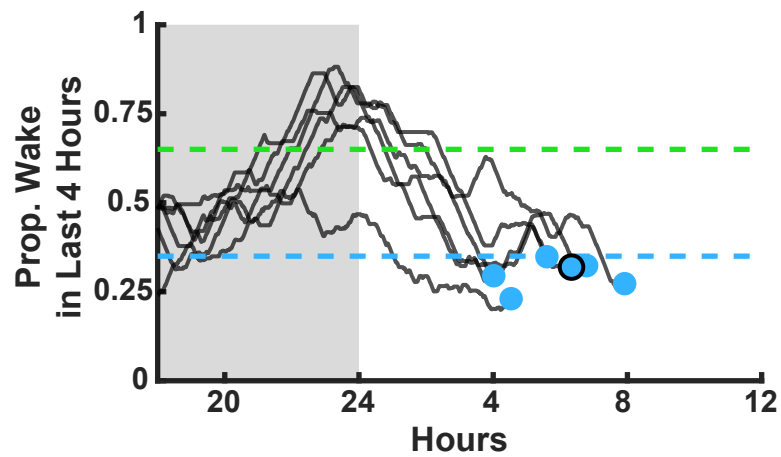

**D**

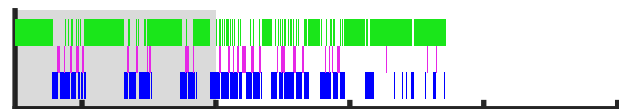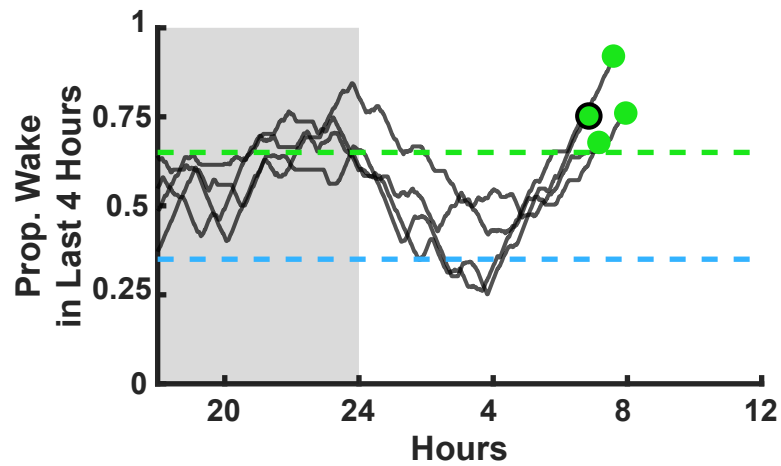

**E**

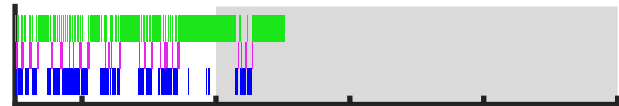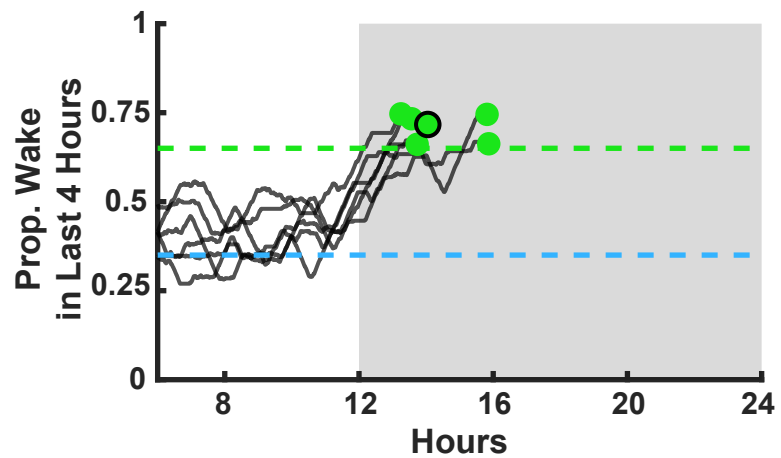

Supplement: supp [file elife_poa_e66304_Figure_3_figure_supplement_2.pdf › elife_poa_e66304_Figure_3_figure_supplement_2.pdf]

**A**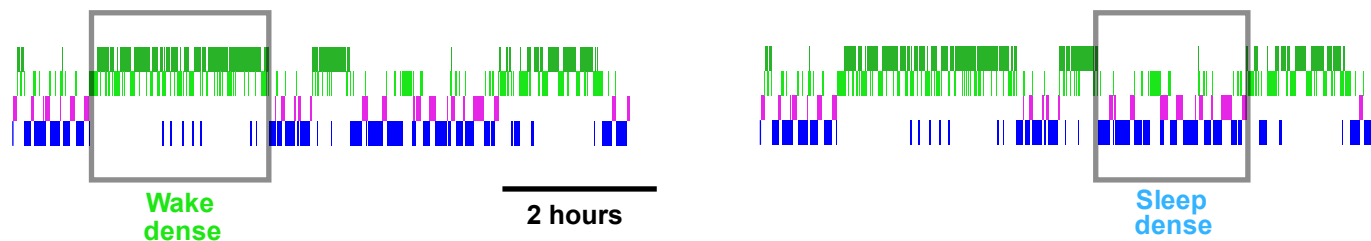**B**

&gt;65% Threshold

&gt;75% Threshold

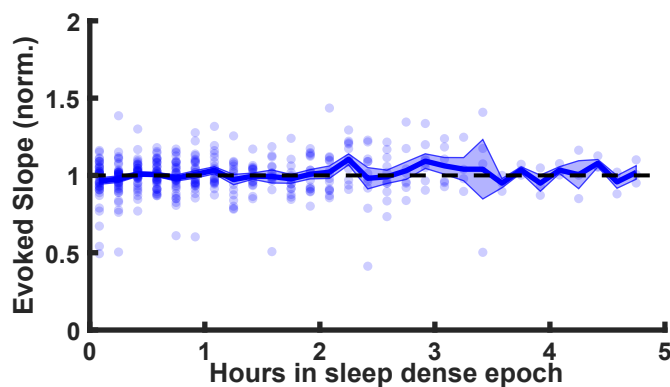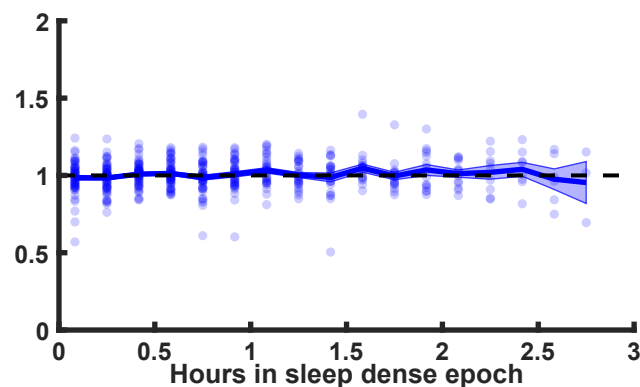**C**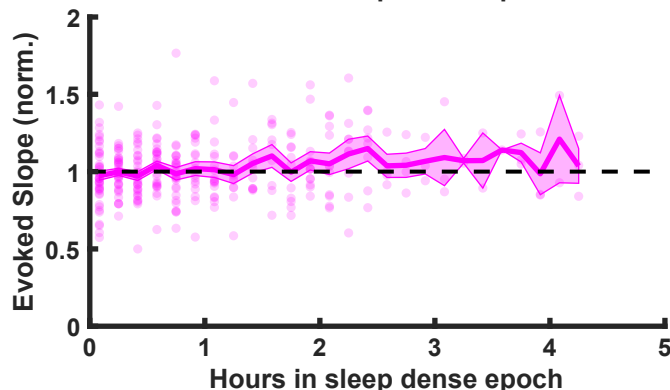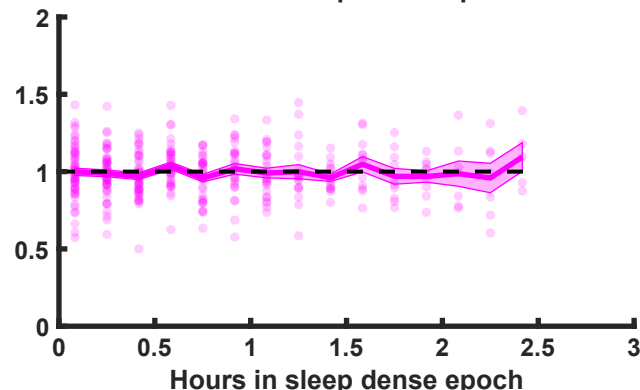**D**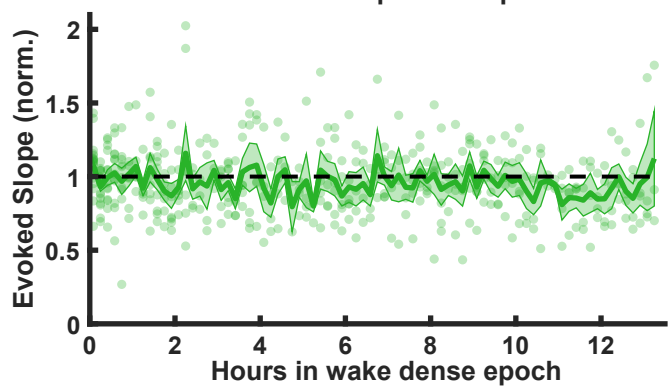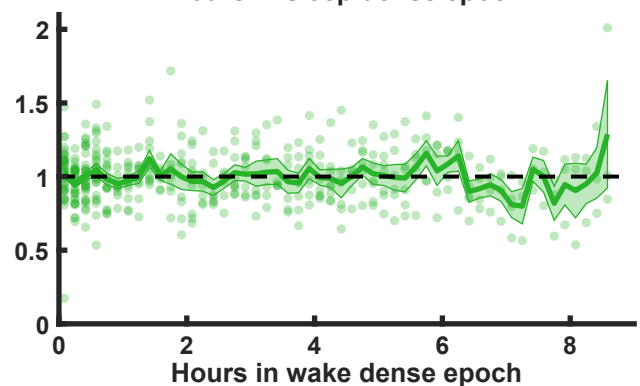**E**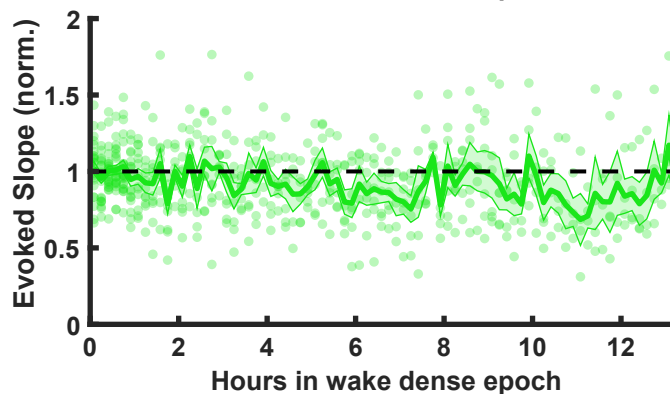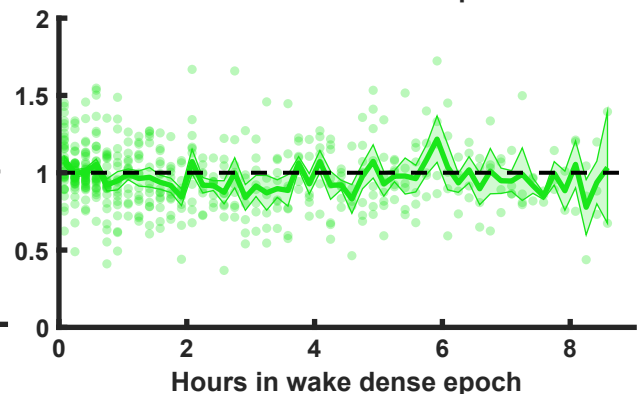

Supplement: supp [file elife_poa_e66304_Figure_6_figure_supplement_1.pdf › elife_poa_e66304_Figure_6_figure_supplement_1.pdf]
